# Supplementary material
Source: PubMed Central journal article supplement (PMC7846470)
Supplement: mmc1.pdf [file mmc1.pdf]

Table S1 Distribution of SARS-CoV-2 variant lineages by continents during the first 6 months of pandemic

| Continent | Time period    | Sequence (N) | Proportion of variant lineages |       |       |       |       |       |
|-----------|----------------|--------------|--------------------------------|-------|-------|-------|-------|-------|
|           |                |              | GR                             | GH    | G     | V     | L     | S     |
| Global    | Before Feb     | 378          | 0.0%                           | 0.3%  | 1.3%  | 7.1%  | 58.2% | 33.1% |
|           | Feb (1st half) | 353          | 0.0%                           | 2.0%  | 2.0%  | 19.3% | 50.4% | 26.3% |
|           | Feb (2nd half) | 664          | 9.3%                           | 3.5%  | 10.7% | 20.9% | 37.8% | 17.8% |
|           | Mar (1st half) | 7,003        | 17.5%                          | 19.2% | 18.3% | 12.2% | 13.6% | 19.2% |
|           | Mar (2nd half) | 20,380       | 21.6%                          | 25.5% | 21.6% | 11.9% | 9.8%  | 9.6%  |
|           | Apr (1st half) | 16,514       | 34.3%                          | 21.6% | 26.6% | 6.6%  | 6.9%  | 4.1%  |
|           | Apr (2nd half) | 10,747       | 40.8%                          | 21.9% | 26.1% | 3.5%  | 5.2%  | 2.5%  |
|           | May (1st half) | 5,866        | 43.3%                          | 23.7% | 25.1% | 1.3%  | 4.2%  | 2.5%  |
|           | May (2nd half) | 3,425        | 51.7%                          | 21.9% | 21.0% | 0.6%  | 3.1%  | 1.8%  |
|           | Jun (1st half) | 2,686        | 61.1%                          | 16.6% | 17.6% | 0.5%  | 1.9%  | 2.4%  |
|           | Jun (2nd half) | 1,555        | 53.3%                          | 21.3% | 20.5% | 0.5%  | 3.0%  | 1.5%  |
| Africa    | Before Feb     | -            | -                              | -     | -     | -     | -     | -     |
|           | Feb (1st half) | -            | -                              | -     | -     | -     | -     | -     |
|           | Feb (2nd half) | 3            | 33.3%                          | 33.3% | 33.3% | -     | -     | -     |
|           | Mar (1st half) | 25           | 8.0%                           | 32.0% | 52.0% | -     | 4.0%  | 4.0%  |
|           | Mar (2nd half) | 156          | 17.3%                          | 19.2% | 36.5% | 5.8%  | 6.4%  | 14.7% |
|           | Apr (1st half) | 159          | 3.8%                           | 11.3% | 72.3% | 1.3%  | 0.6%  | 10.7% |
|           | Apr (2nd half) | 145          | 16.6%                          | 11.0% | 66.2% | -     | 2.1%  | 4.1%  |
|           | May (1st half) | 109          | 30.3%                          | 19.3% | 48.6% | -     | -     | 1.8%  |
|           | May (2nd half) | 38           | 63.2%                          | 10.5% | 26.3% | -     | -     | -     |
|           | Jun (1st half) | 192          | 39.6%                          | 7.8%  | 52.1% | -     | -     | 0.5%  |
|           | Jun (2nd half) | 117          | 65.8%                          | 1.7%  | 31.6% | -     | -     | 0.9%  |
| Asia      | Before Feb     | 337          | -                              | -     | 1.2%  | 5.3%  | 59.9% | 33.5% |
|           | Feb (1st half) | 321          | -                              | 2.2%  | 1.2%  | 17.1% | 52.3% | 27.1% |
|           | Feb (2nd half) | 294          | -                              | 3.7%  | 0.3%  | 32.7% | 48.0% | 15.3% |
|           | Mar (1st half) | 510          | 9.8%                           | 10.0% | 9.0%  | 10.8% | 37.5% | 22.9% |
|           | Mar (2nd half) | 985          | 24.9%                          | 21.0% | 11.1% | 5.7%  | 26.3% | 11.1% |
|           | Apr (1st half) | 706          | 25.5%                          | 22.8% | 6.2%  | 2.1%  | 40.1% | 3.3%  |
|           | Apr (2nd half) | 485          | 18.1%                          | 20.0% | 15.1% | 0.2%  | 41.2% | 5.4%  |
|           | May (1st half) | 436          | 28.4%                          | 11.9% | 22.2% | -     | 28.2% | 9.2%  |
|           | May (2nd half) | 429          | 34.3%                          | 25.9% | 20.0% | -     | 17.9% | 1.9%  |
|           | Jun (1st half) | 513          | 42.1%                          | 26.3% | 22.2% | -     | 8.0%  | 1.4%  |
|           | Jun (2nd half) | 181          | 53.0%                          | 17.1% | 7.7%  | -     | 21.5% | 0.6%  |
| Europe    | Before Feb     | 12           | -                              | 8.3%  | 8.3%  | 41.7% | 25.0% | 16.7% |
|           | Feb (1st half) | 24           | -                              | -     | 12.5% | 50.0% | 33.3% | 4.2%  |
|           | Feb (2nd half) | 226          | 24.8%                          | 3.5%  | 28.3% | 17.3% | 20.8% | 5.3%  |
|           | Mar (1st half) | 4,352        | 23.7%                          | 13.4% | 23.3% | 16.3% | 13.0% | 10.4% |
|           | Mar (2nd half) | 12,334       | 28.5%                          | 11.0% | 28.3% | 16.7% | 11.5% | 4.0%  |
|           | Apr (1st half) | 11,617       | 43.7%                          | 8.8%  | 31.3% | 8.6%  | 5.8%  | 1.8%  |
|           | Apr (2nd half) | 7,612        | 52.4%                          | 9.1%  | 28.7% | 4.7%  | 4.0%  | 1.1%  |
|           | May (1st half) | 3,843        | 57.4%                          | 11.0% | 26.7% | 1.9%  | 2.4%  | 0.7%  |
|           | May (2nd half) | 2,161        | 59.1%                          | 13.6% | 24.9% | 0.9%  | 1.1%  | 0.4%  |
|           | Jun (1st half) | 1,022        | 69.8%                          | 7.3%  | 20.5% | 1.3%  | 0.9%  | 0.2%  |
|           | Jun (2nd half) | 562          | 76.0%                          | 6.2%  | 15.5% | 1.2%  | 1.1%  | -     |
|           | Before Feb     | 14           | -                              | -     | -     | 7.1%  | 57.1% | 35.7% |
|           | Feb (1st half) | 4            | -                              | -     | -     | 25.0% | 25.0% | 50.0% |
|           | Feb (2nd half) | 117          | 4.3%                           | 2.6%  | 0.9%  | 1.7%  | 39.3% | 51.3% |
|           | Mar (1st half) | 1,784        | 4.7%                           | 38.0% | 7.7%  | 2.9%  | 7.0%  | 39.8% |
|           | Mar (2nd half) | 4,943        | 4.1%                           | 63.8% | 7.0%  | 2.6%  | 3.4%  | 19.1% |

| Continent     | Time period    | Sequence (N) | Proportion of variant lineages |       |       |       |       |       |
|---------------|----------------|--------------|--------------------------------|-------|-------|-------|-------|-------|
|               |                |              | GR                             | GH    | G     | V     | L     | S     |
| North America | Apr (1st half) | 3,251        | 3.5%                           | 67.4% | 12.2% | 1.3%  | 4.4%  | 11.1% |
|               | Apr (2nd half) | 2,281        | 7.1%                           | 66.5% | 17.3% | 0.6%  | 1.8%  | 6.8%  |
|               | May (1st half) | 1,361        | 12.1%                          | 60.2% | 20.5% | 0.3%  | 1.3%  | 5.6%  |
|               | May (2nd half) | 703          | 41.1%                          | 42.5% | 10.1% | -     | 0.1%  | 6.1%  |
|               | Jun (1st half) | 888          | 65.8%                          | 22.7% | 5.4%  | -     | -     | 6.1%  |
|               | Jun (2nd half) | 635          | 29.9%                          | 39.8% | 26.9% | -     | -     | 3.3%  |
| Oceania       | Before Feb     | 15           | -                              | -     | -     | 20.0% | 46.7% | 33.3% |
|               | Feb (1st half) | 4            | -                              | -     | -     | -     | 25.0% | 75.0% |
|               | Feb (2nd half) | 19           | -                              | -     | 5.3%  | -     | 89.5% | 5.3%  |
|               | Mar (1st half) | 190          | 10.5%                          | 5.3%  | 13.7% | 17.4% | 33.2% | 20.0% |
|               | Mar (2nd half) | 1,528        | 13.4%                          | 23.7% | 19.8% | 11.1% | 9.2%  | 22.9% |
|               | Apr (1st half) | 461          | 12.6%                          | 29.1% | 34.1% | 3.3%  | 8.9%  | 12.1% |
|               | Apr (2nd half) | 85           | 12.9%                          | 29.4% | 34.1% | 2.4%  | 20.0% | 1.2%  |
|               | May (1st half) | 106          | 7.5%                           | 67.9% | 13.2% | -     | 11.3% | -     |
|               | May (2nd half) | 72           | 33.3%                          | 51.4% | 6.9%  | -     | 4.2%  | 4.2%  |
|               | Jun (1st half) | 69           | 71.0%                          | 26.1% | -     | -     | 2.9%  | -     |
|               | Jun (2nd half) | 48           | 70.8%                          | 18.8% | 6.3%  | -     | 4.2%  | -     |
| South America | Before Feb     | -            | -                              | -     | -     | -     | -     | -     |
|               | Feb (1st half) | -            | -                              | -     | -     | -     | -     | -     |
|               | Feb (2nd half) | 5            | -                              | -     | 60.0% | 40.0% | -     | -     |
|               | Mar (1st half) | 142          | 26.8%                          | 12.0% | 33.1% | 5.6%  | 4.9%  | 17.6% |
|               | Mar (2nd half) | 434          | 46.5%                          | 21.4% | 21.4% | 1.6%  | 0.7%  | 8.3%  |
|               | Apr (1st half) | 320          | 71.6%                          | 12.5% | 12.8% | 1.6%  | 0.6%  | 0.9%  |
|               | Apr (2nd half) | 139          | 79.9%                          | 3.6%  | 16.5% | -     | -     | -     |
|               | May (1st half) | 11           | 72.7%                          | 9.1%  | 18.2% | -     | -     | -     |
|               | May (2nd half) | 22           | 50.0%                          | 18.2% | 31.8% | -     | -     | -     |
|               | Jun (1st half) | 2            | 100.0%                         | -     | -     | -     | -     | -     |
|               | Jun (2nd half) | 12           | 41.7%                          | 8.3%  | 50.0% | -     | -     | -     |
